# Supplementary material
Source: PubMed Central journal article supplement (PMC3850200)
Supplement: supp_pp.113.225995_225995suppfig.pdf [file supp_pp.113.225995_225995suppfig.pdf]

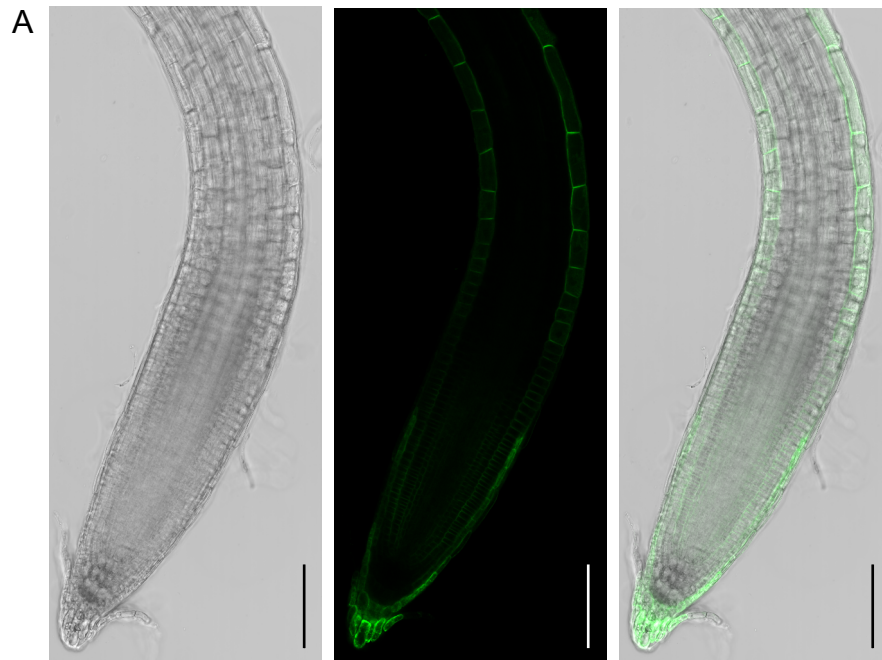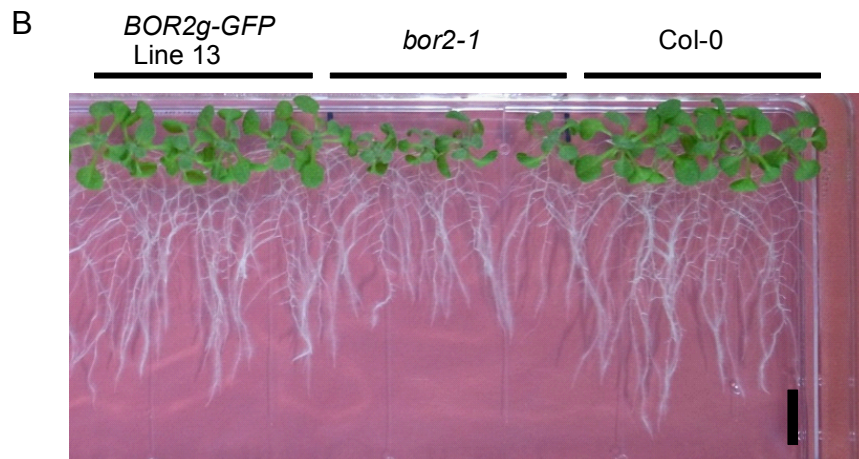

Supplemental Figure S1. Miwa et al.

**Supplemental Figure S1.** Functional complementation of *A. thaliana* carrying *BOR2genome-GFP* (*BOR2g-GFP*).

A, GFP imaging of transgenic *A. thaliana* roots carrying *BOR2genome-GFP* (*BOR2g-GFP*) in *bor2-1*. Plants were grown on solid media containing 1  $\mu$ M boric acid for 5 days. Bars = 100  $\mu$ m. B, Plant growth of the transgenic *A. thaliana* carrying *BOR2genome-GFP* (*BOR2g-GFP*) in *bor2-1*. Plants were grown on solid media containing 0.3  $\mu$ M boric acid for 14 days. Bar = 10 mm.
